# Supplementary material
Source: PubMed Central journal article supplement (PMC7003036)
Supplement: supplemental_figures_30sept19_ddz290.pdf [file supplemental_figures_30sept19_ddz290.pdf]

Supplemental Table 1. Western blot antibodies and their source and dilutions.

| <b>Antibody</b>    | <b>Species</b> | <b>Dilution</b> | <b>Source</b>  | <b>Catalog No.</b> |
|--------------------|----------------|-----------------|----------------|--------------------|
| $\beta$ -actin-HRP | mouse          | 1:25,000        | Sigma Aldrich  | A3854              |
| KEAP1              | rabbit         | 1:2,000         | Protein Tech   | 10503-2-AP         |
| LC3                | rabbit         | 1:500           | Cell Signaling | 2775S              |
| P62                | rabbit         | 1:10,000        | Abcam          | Ab109012           |
| PPAR $\alpha$      | mouse          | 1:100           | Santa Cruz     | Sc-398394          |
| HRP                | rabbit         | 1:80,000        | Sigma Aldrich  | A0545              |
| HRP                | mouse          | 1:10,000        | Sigma Aldrich  | A-9044             |

Supplemental Table 2. qPCR primers sequences.

| <b>Gene</b>                     | <b>FWD Primer</b>       | <b>REV Primer</b>       |
|---------------------------------|-------------------------|-------------------------|
| <i>Acadl</i>                    | GGAATGAAAGCTCAGGACA     | AGAATCCGCATTAGCTGCAT    |
| <i>Acadvl</i>                   | CTACTGTGCTTCAGGGACAAC   | CAAAGGACTTCGATTCTGCCC   |
| <i>Acadm</i>                    | AGGTTTCAAGATCGCAATGG    | CATTGTCCAAAAGCCAAACC    |
| <i>Acox1</i>                    | TCGAAGCCAGCGTTACGAG     | ATCTCCGTCTGGGCGTAGG     |
| <i>Actin</i>                    | AGAGGGAAATCGTGCGTGAC    | CAATAGTGATGACCTGGCCGT   |
| <i>Bax</i>                      | AGCAAACCTGGTGCTCAAGGC   | CCACAAAGATGGTCACTGT     |
| <i>Bcl-2</i>                    | GTGGTGGAGGAACTCTCA      | GTTCCACAAAGGCATCCCA     |
| <i>Beclin1</i>                  | GGCCAATAAGATGGGTCTGA    | GCTGCACACAGTCCAGAAAA    |
| <i>Cas3</i>                     | TGGTGATGAAGGGGTCATTTATG | TTCGGCTTTCCAGTCAGACTC   |
| <i>Cas8</i>                     | GGAAACAAGCTGGTAGCTGACA  | CCTGGGTCAACACAAGATGCT   |
| <i>Cpt2</i>                     | CAGCACAGCATCGTACCCA     | TCCAATGCCGTTCTCAAAT     |
| <i>Dpp3</i>                     | TGAAGAAGAGTACCAGGCAT    | GACTCTCAGAACCTCAGTGC    |
| <i>Fas</i>                      | ATCCTGGAACGAGAACACGATCT | AGAGACGTGTCACTCCTGGACTT |
| <i>Hadha</i>                    | AGCAACACGAATATCACAGGAAG | AGGCACACCCACCATTTTGG    |
| <i>Hadhb</i>                    | TGAATATGCACTGCGTTCTCAT  | CCTTTCCTGGTACTTTGAAGGG  |
| <i>Keap-1</i>                   | GGCAGGACCAGTTGAACAGT    | GGGTCACCTCACTCCAGGTA    |
| <i>Lc3-b</i>                    | CAGTGATTATAGAGCGATACAA  | GCCGTCTGATTATCTTGATG    |
| <i>Nqo1</i>                     | GGAGGTACTCGAATCTGACCT   | CCACAGAGAGGCCAAACTTG    |
| <i>Nrf2</i>                     | CTCGCTGGAAAAGAAGTG      | CCGTCCAGGAGTTCAGAGG     |
| <i>p21</i>                      | GACAAGAGGCCAGTACTTC     | GCTTGGAGTGATAGAAATCTGTC |
| <i>p53</i>                      | GAGCTGAATGAGGCCTTGGA    | CTGAGTCAGGCCCTTCTGTCTT  |
| <i>p62</i>                      | AAGATAGCCTTGGAGTCG      | TGGAGTTCACCTGTAGATG     |
| <i>Pcca</i>                     | TTCATACCAATGCCTAGTGGTGT | GACAGCCTCATCCGCCATTTT   |
| <i>Pccb</i>                     | GCGGCGATTAGGATTCGGG     | TGCGCTCTTTAACTGAAACCG   |
| <i>Ppar-b/d</i>                 | TTGAGCCCAAGTTCGAGTTTG   | CGGTCTCCACACAGAATGATG   |
| <i>Ppar-g</i>                   | TGTGGGGATAAAGCATCAGGC   | CCGGCAGTTAAGATCACACCTAT |
| <i>Ppar-<math>\alpha</math></i> | TCGGCGAACTATTCCGGCTG    | GCACTTGTGAAAACGGCAGT    |
| <i>Ptma</i>                     | GCTGAGGATGATGAGGATGAC   | GGAAGTGGAGGGTGAATAGG    |
| <i>Scd1</i>                     | AGTTCCGCCACTCGCCTAC     | GATAGTCAGTTGCTCGCCTCAC  |
| <i>Shp</i>                      | CAGGTCGTCCGACTATTCTG    | ACTTCACACAGTGCCAGTG     |
| <i>Slc25a20</i>                 | GACGAGCCGAAACCCATCAG    | AGTCGGACCTTGACCGTGT     |

Supplemental Table 3. Plasma acylcarnitines in wild-type and GSD Ia mice treated with vehicle or fenofibrate. Data shows acylcarnitines concentrations in the plasma  $\pm$  SEM. Wild-type vehicle n=5. GSD Ia vehicle n=4. GSD Ia fenofibrate n=5. Statistics and direction on change shown in columns 5 and 6. Affect WT vs. GSD Ia compares WT vehicle and GSD Ia vehicle groups. Affect fenofibrate compares GSD Ia vehicle and fenofibrate groups. \*p < 0.05, \*\* p < 0.01, \*\*\* p < 0.001, \*\*\*\* p < 0.0001 from one-way ANOVA and Tukey's multiple comparison test.

|                | WT, Vehicle        | GSD Ia, Vehicle   | GSD Ia, Fenofibrate | Effect WT vs. GSD Ia | Effect fenofibrate |
|----------------|--------------------|-------------------|---------------------|----------------------|--------------------|
| Total Acyl     | 17.174 $\pm$ 0.559 | 25.08 $\pm$ 3.241 | 26.374 $\pm$ 6.882  | $\uparrow$ ***       | $\uparrow$ ***     |
| C2             | 13.96 $\pm$ 0.50   | 13.5 $\pm$ 0.775  | 17.458 $\pm$ 5.258  | NS                   | NS                 |
| C3:1           | 0 $\pm$ 0          | 0.02 $\pm$ 0.005  | 0.004 $\pm$ 0.004   | NS                   | NS                 |
| C3             | 0.314 $\pm$ 0.042  | 0.52 $\pm$ 0.028  | 0.322 $\pm$ 0.022   | $\uparrow$ **        | $\downarrow$ **    |
| C4             | 0.422 $\pm$ 0.051  | 0.3 $\pm$ 0.034   | 0.266 $\pm$ 0.079   | NS                   | NS                 |
| C5:1           | 0.002 $\pm$ 0.002  | 0 $\pm$ 0.003     | 0.002 $\pm$ 0.002   | NS                   | NS                 |
| C5             | 0.25 $\pm$ 0.029   | 0.26 $\pm$ 0.073  | 0.168 $\pm$ 0.015   | NS                   | NS                 |
| C4-OH          | 0.106 $\pm$ 0.006  | 0.12 $\pm$ 0.013  | 0.206 $\pm$ 0.134   | NS                   | NS                 |
| C6             | 0.046 $\pm$ 0.019  | 0.08 $\pm$ 0.011  | 0.042 $\pm$ 0.015   | NS                   | NS                 |
| C5-OH/ C3-DC   | 0.178 $\pm$ 0.025  | 0.08 $\pm$ 0.005  | 0.29 $\pm$ 0.056    | NS                   | $\uparrow$ *       |
| BZL            | 0 $\pm$ 0          | 0 $\pm$ 0         | 0 $\pm$ 0           | NS                   | NS                 |
| C4-DC          | 0.112 $\pm$ 0.023  | 0.04 $\pm$ 0.003  | 0.262 $\pm$ 0.042   | NS                   | $\uparrow$ ***     |
| C8:1           | 0.012 $\pm$ 0.002  | 0.02 $\pm$ 0.003  | 0.006 $\pm$ 0.004   | NS                   | NS                 |
| C8             | 0.038 $\pm$ 0.002  | 0.02 $\pm$ 0.006  | 0.078 $\pm$ 0.051   | NS                   | NS                 |
| C5-DC          | 0.066 $\pm$ 0.013  | 0.08 $\pm$ 0.006  | 1.02 $\pm$ 0.532    | NS                   | NS                 |
| C6:1-DC        | 0.036 $\pm$ 0.002  | 0.04 $\pm$ 0.003  | 0.064 $\pm$ 0.024   | NS                   | NS                 |
| C6-DC          | 0.076 $\pm$ 0.004  | 0.1 $\pm$ 0.011   | 0.136 $\pm$ 0.029   | NS                   | NS                 |
| C10:3          | 0 $\pm$ 0          | 0 $\pm$ 0         | 0 $\pm$ 0           | NS                   | NS                 |
| C10:2          | 0 $\pm$ 0          | 0 $\pm$ 0.003     | 0.004 $\pm$ 0.004   | NS                   | NS                 |
| C10:1          | 0.014 $\pm$ 0.002  | 0.02 $\pm$ 0.003  | 0.01 $\pm$ 0.004    | NS                   | NS                 |
| C10            | 0.056 $\pm$ 0.014  | 0.04 $\pm$ 0.011  | 0.11 $\pm$ 0.038    | NS                   | NS                 |
| C7-DC          | 0.08 $\pm$ 0.021   | 0.16 $\pm$ 0.007  | 0.248 $\pm$ 0.110   | NS                   | NS                 |
| C8:1- DC       | 0.024 $\pm$ 0.004  | 0.02 $\pm$ 0.003  | 0.024 $\pm$ 0.004   | NS                   | NS                 |
| C8-DC          | 0.022 $\pm$ 0.002  | 0.04 $\pm$ 0.003  | 0.042 $\pm$ 0.015   | NS                   | NS                 |
| C12:1          | 0.012 $\pm$ 0.002  | 0.02 $\pm$ 0.004  | 0.01 $\pm$ 0.004    | $\uparrow$ *         | $\downarrow$ **    |
| C12            | 0.076 $\pm$ 0.007  | 0.22 $\pm$ 0.095  | 0.076 $\pm$ 0.007   | $\uparrow$ ***       | $\downarrow$ ***   |
| C12-OH/C10-DC  | 0.012 $\pm$ 0.002  | 0.04 $\pm$ 0.003  | 0.04 $\pm$ 0.013    | NS                   | NS                 |
| C14:2          | 0.018 $\pm$ 0.002  | 0.04 $\pm$ 0.012  | 0.022 $\pm$ 0.005   | $\uparrow$ **        | $\downarrow$ **    |
| C14:1          | 0.048 $\pm$ 0.004  | 0.2 $\pm$ 0.044   | 0.082 $\pm$ 0.016   | $\uparrow$ ****      | $\downarrow$ ****  |
| C14            | 0.208 $\pm$ 0.006  | 0.94 $\pm$ 0.312  | 0.42 $\pm$ 0.050    | $\uparrow$ ****      | $\downarrow$ ***   |
| OH-C14:1       | 0.006 $\pm$ 0.002  | 0.04 $\pm$ 0.008  | 0.02 $\pm$ 0.000    | $\uparrow$ ****      | $\downarrow$ ***   |
| C14-OH/ C12-DC | 0.012 $\pm$ 0.002  | 0.02 $\pm$ 0.004  | 0.016 $\pm$ 0.004   | $\uparrow$ *         | $\downarrow$ *     |
| C16:2          | 0.016 $\pm$ 0.002  | 0.12 $\pm$ 0.019  | 0.052 $\pm$ 0.010   | $\uparrow$ ****      | $\downarrow$ ****  |
| C16:1          | 0.048 $\pm$ 0.006  | 0.32 $\pm$ 0.085  | 0.232 $\pm$ 0.038   | $\uparrow$ ****      | $\downarrow$ **    |
| C16            | 0.344 $\pm$ 0.012  | 2.74 $\pm$ 0.597  | 1.64 $\pm$ 0.166    | $\uparrow$ ****      | $\downarrow$ **    |
| C16-OH         | 0.046 $\pm$ 0.005  | 0.22 $\pm$ 0.048  | 0.088 $\pm$ 0.005   | $\uparrow$ ****      | $\downarrow$ ****  |
| C18:2          | 0.12 $\pm$ 0.016   | 0.8 $\pm$ 0.174   | 0.496 $\pm$ 0.059   | $\uparrow$ ****      | $\downarrow$ ***   |
| C18:1          | 0.186 $\pm$ 0.021  | 1.84 $\pm$ 0.433  | 1.274 $\pm$ 0.196   | $\uparrow$ ****      | $\downarrow$ **    |

|                |               |              |               |        |        |
|----------------|---------------|--------------|---------------|--------|--------|
| C18            | 0.084 ± 0.005 | 1.38 ± 0.462 | 0.804 ± 0.062 | ↑ **** | ↓ ***  |
| C18:2-OH       | 0.01 ± 0.003  | 0.02 ± 0.011 | 0.016 ± 0.004 | ↑ **** | ↓ ***  |
| C18:1-OH       | 0.012 ± 0.004 | 0.06 ± 0.013 | 0.032 ± 0.005 | ↑ **** | ↓ ***  |
| C18-OH         | 0.01 ± 0.003  | 0.16 ± 0.037 | 0.066 ± 0.014 | ↑ **** | ↓ ***  |
| C16-DC         | 0.01 ± 0.003  | 0.16 ± 0.037 | 0.066 ± 0.014 | ↑ **** | ↓ ***  |
| C20:4          | 0.062 ± 0.016 | 0.22 ± 0.023 | 0.09 ± 0.018  | ↑ **** | ↓ **** |
| C20            | 0.008 ± 0.004 | 0.02 ± 0.018 | 0.034 ± 0.006 | ↑ **   | ↓ *    |
| C18:1-DC       | 0.004 ± 0.002 | 0.02 ± 0.000 | 0.014 ± 0.004 | ↑ **   | NS     |
| C18-DC/ C20-OH | 0.008 ± 0.004 | 0.02 ± 0.003 | 0.022 ± 0.008 | NS     | NS     |
| C22            | 0 ± 0         | 0 ± 0.006    | 0 ± 0         | NS     | NS     |

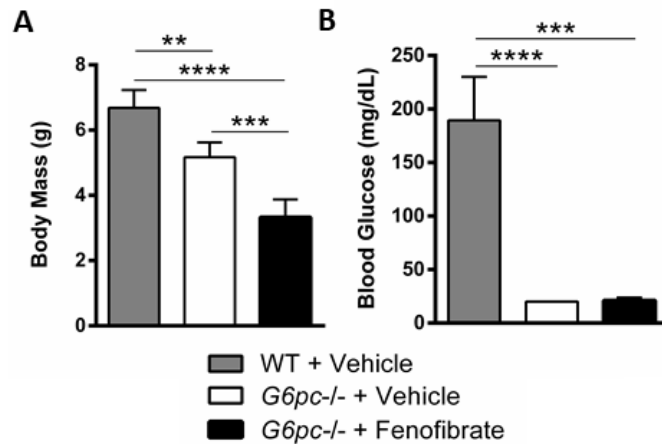

Supplemental Figure 1. A) Body mass (g) (n=4-5). B) Blood glucose measured by glucometer. Low threshold is reported at 25 mg/dL. (n=4-5). One-way ANOVA with Tukey's multiple comparison test was performed. \* p < 0.05; \*\* p < 0.01; \*\*\* p < 0.001; \*\*\*\* p < 0.0001.

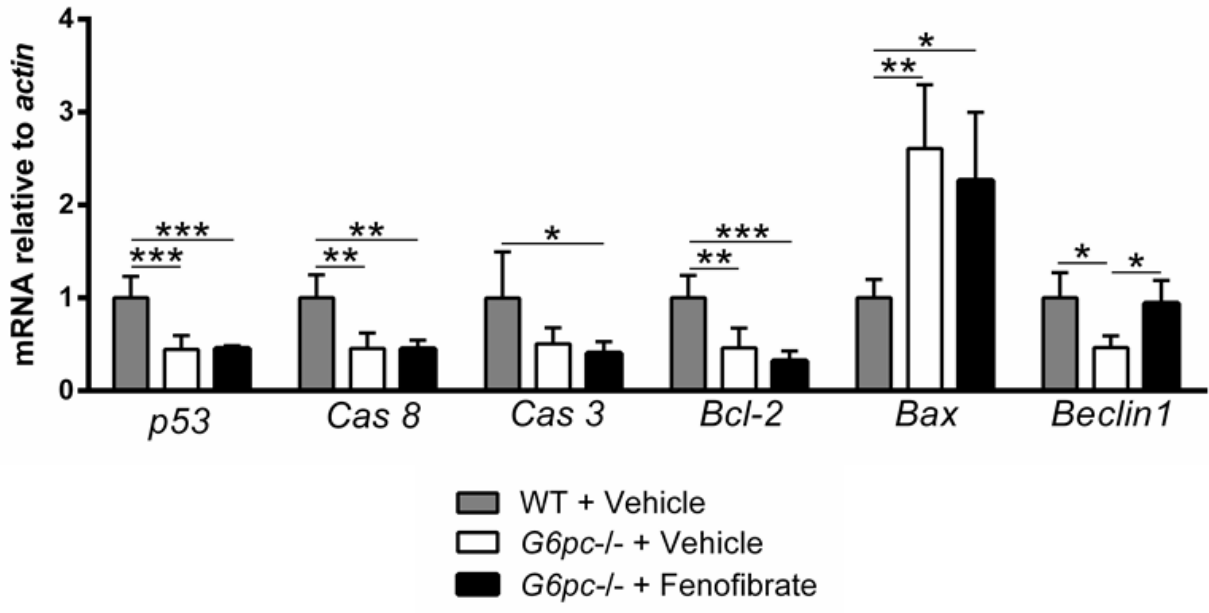

Supplemental Figure 2. Most apoptosis associated transcripts are not significantly affected by fenofibrate. A) Apoptosis associated transcripts. One-way ANOVA with Tukey's multiple comparison test was performed. \* p < 0.05; \*\* p < 0.01; \*\*\* p < 0.001; \*\*\*\* p < 0.0001.

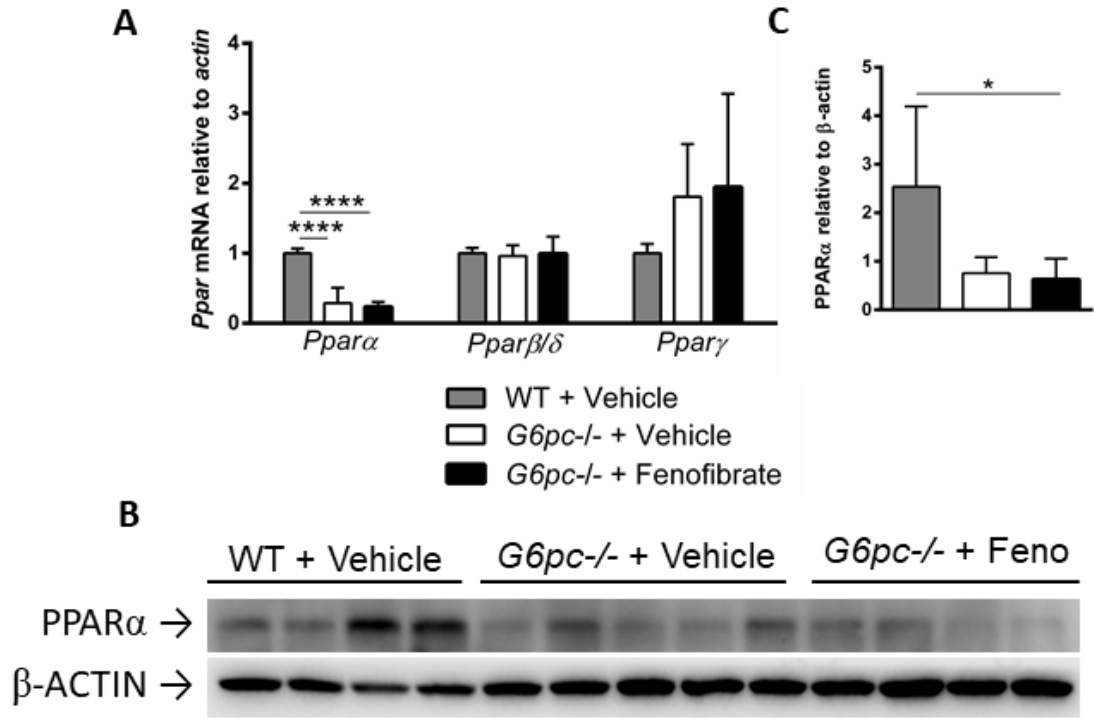

Supplemental Figure 3. Hepatic PPAR transcripts and protein. A) All *Ppar* subunit transcripts (n=4-5). B) Western blot of PPARα with β-ACTIN loading control (n=4-5). C) Quantification of western blot in B normalized to loading control. One-way ANOVA with Tukey's multiple comparison test was performed. \* p < 0.05; \*\* p < 0.01; \*\*\* p < 0.001; \*\*\*\* p < 0.0001.

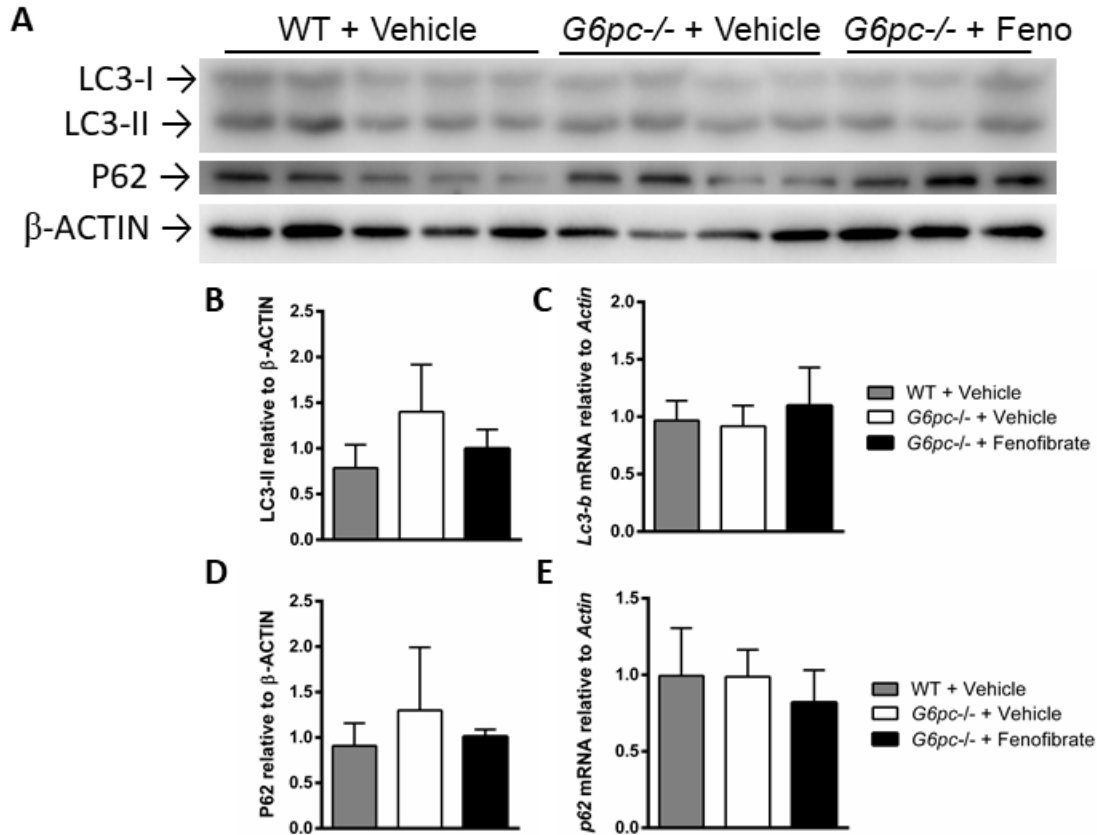

Supplemental Figure 4. Fenofibrate did not significantly affect renal autophagy. A) Western blot of LC3 and P62 with β-ACTIN loading control. Each lane represents a biological replicate (n=3-5). B) Quantification of renal LC3-II protein from A relative to β-ACTIN. C) Renal *LC3* transcripts relative to *actin*. D) Renal P62 protein from A relative to β-ACTIN. E) Renal *p62* transcripts relative to *actin*. One-way ANOVA with Tukey's multiple comparison test was performed. \*  $p < 0.05$ ; \*\*  $p < 0.01$ ; \*\*\*  $p < 0.001$ ; \*\*\*\*  $p < 0.0001$ .

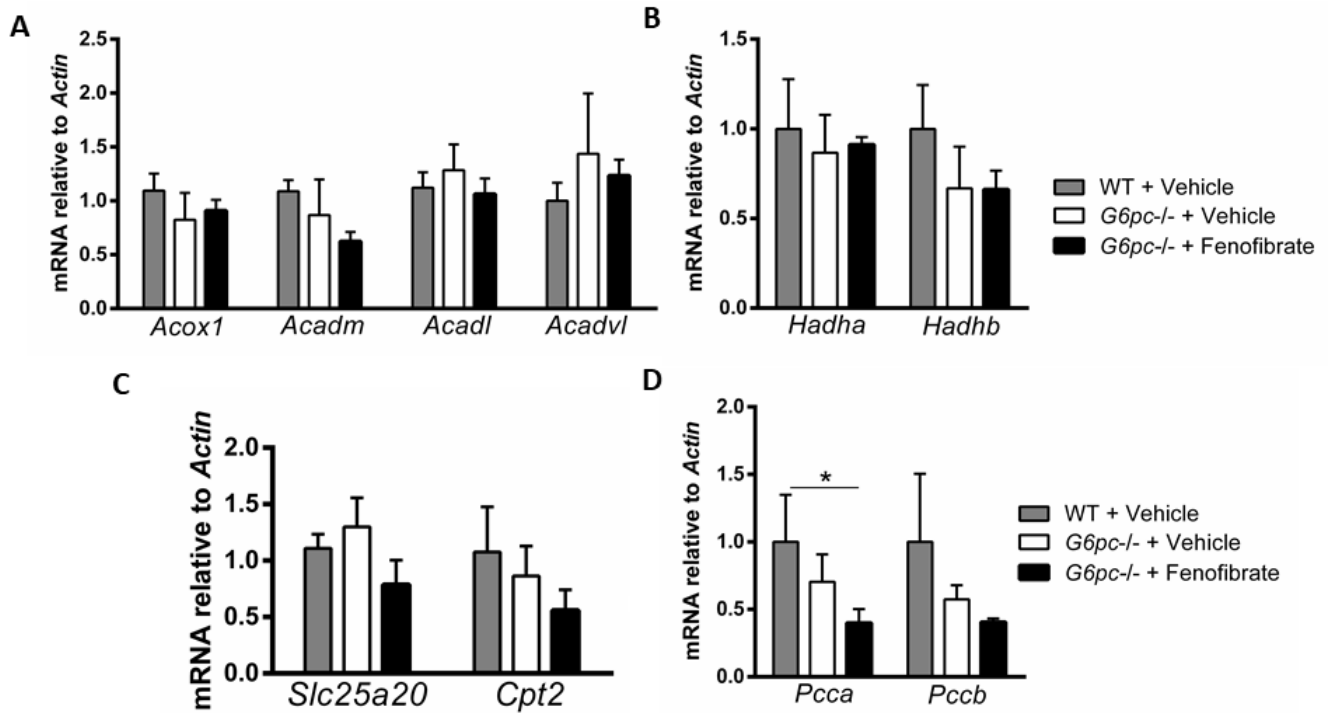

Supplemental Figure 5. Transcripts implicated in  $\beta$ -oxidation are not significantly changed in the kidney by fenofibrate. A) Acyl-CoA dehydrogenase transcripts (n=3-5). B) MTFP subunit transcripts, *Hadha* and *Hadhb* (n=3-5). C) Transcripts of *Cpt2* and *Slc25a20* implicated in CPTII/CACT deficiencies (n=3-5). D) Succinate metabolism transcripts, *Pcca* and *Pccb* (n=3-5). One-way ANOVA with Tukey's multiple comparison test was performed. \*  $p < 0.05$ ; \*\*  $p < 0.01$ ; \*\*\*  $p < 0.001$ ; \*\*\*\*  $p < 0.0001$ .

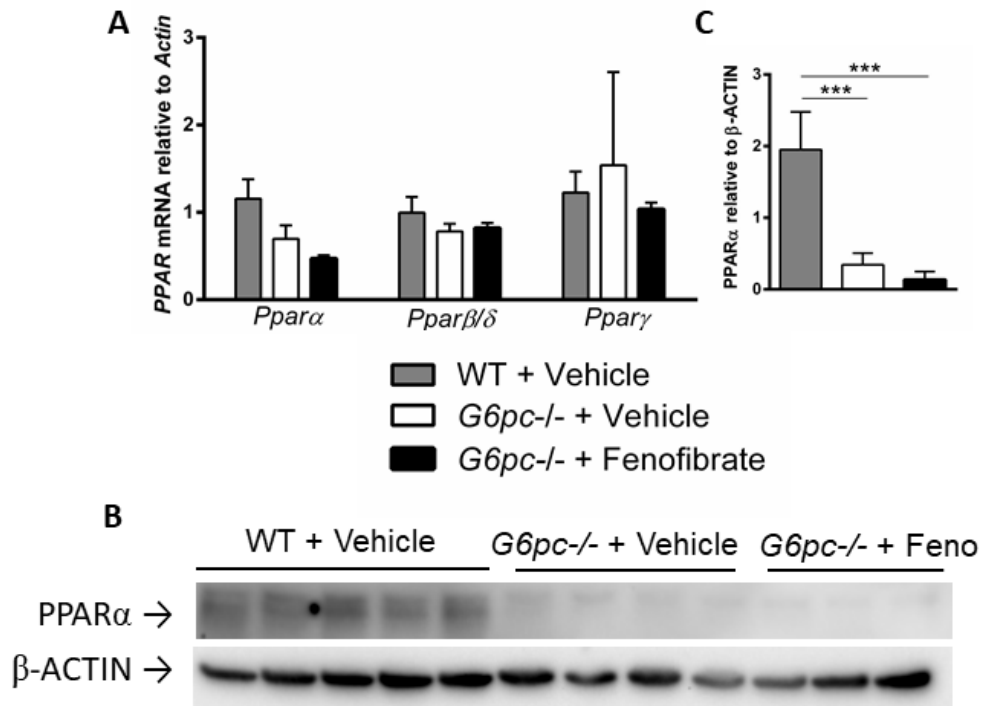

Supplemental Figure 6. Renal PPAR transcripts and protein. A) All *Ppar* subunit transcripts (n=4-5). B) Western blot of PPARα with β-ACTIN loading control (n=3-5). C) Quantification of western blot in B normalized to loading control. One-way ANOVA with Tukey's multiple comparison test was performed. \* p < 0.05; \*\* p < 0.01; \*\*\* p < 0.001; \*\*\*\* p < 0.0001.
